# Supplementary material for: Prediction of RNA-protein sequence and structure binding preferences using deep convolutional and recurrent neural networks
Source: PubMed Central journal article supplement (PMC6029131; doi:10.1186/s12864-018-4889-1), 2018-07-03
Supplement: 12864_2018_4889_MOESM3_ESM.pdf [file 12864_2018_4889_MOESM3_ESM.pdf]

Table S1: The AUCs of using only CNNs with sequence and structure information for different hyperparameters learning rate (lr) and weight decay (wd).

| Protein        | lr=0.001,<br>wd=0.001 | lr=0.001,<br>wd=0.0001 | lr=0.01,<br>wd=0.0001 | lr=0.001,<br>wd=0.01 | lr=0.0001,<br>wd=0.0001 |
|----------------|-----------------------|------------------------|-----------------------|----------------------|-------------------------|
| 1 Ago/EIF      | 0.742                 | 0.741                  | 0.5                   | 0.673                | 0.670                   |
| 2 Ago2-MNase   | 0.591                 | 0.595                  | 0.5                   | 0.555                | 0.563                   |
| 3 Ago2-1       | 0.835                 | 0.847                  | 0.5                   | 0.750                | 0.765                   |
| 4 Ago2-2       | 0.846                 | 0.849                  | 0.815                 | 0.767                | 0.764                   |
| 5 Ago2         | 0.632                 | 0.630                  | 0.587                 | 0.629                | 0.628                   |
| 6 eIF4AIII-1   | 0.943                 | 0.938                  | 0.5                   | 0.908                | 0.913                   |
| 7 eIF4AIII-2   | 0.948                 | 0.953                  | 0.940                 | 0.924                | 0.925                   |
| 8 ELAVL1-1     | 0.926                 | 0.926                  | 0.5                   | 0.915                | 0.918                   |
| 9 ELAVL1-MNase | 0.603                 | 0.604                  | 0.5                   | 0.568                | 0.570                   |
| 10 ELAVL1A     | 0.886                 | 0.890                  | 0.5                   | 0.873                | 0.872                   |
| 11 ELAVL1-2    | 0.915                 | 0.916                  | 0.907                 | 0.900                | 0.902                   |
| 12 ESWR1       | 0.915                 | 0.916                  | 0.5                   | 0.887                | 0.889                   |
| 13 FUS         | 0.941                 | 0.942                  | 0.935                 | 0.915                | 0.914                   |
| 14 Mut FUS     | 0.953                 | 0.955                  | 0.5                   | 0.913                | 0.924                   |
| 15 IGFBP1-3    | 0.711                 | 0.712                  | 0.5                   | 0.668                | 0.673                   |
| 16 hnRNPC-1    | 0.958                 | 0.958                  | 0.5                   | 0.951                | 0.951                   |
| 17 hnRNPC-2    | 0.975                 | 0.975                  | 0.5                   | 0.970                | 0.969                   |
| 18 hnRNPL-1    | 0.782                 | 0.782                  | 0.767                 | 0.767                | 0.769                   |
| 19 hnRNPL-2    | 0.779                 | 0.782                  | 0.5                   | 0.765                | 0.762                   |
| 20 hnRNPL-like | 0.732                 | 0.731                  | 0.690                 | 0.714                | 0.713                   |
| 21 MOV10       | 0.805                 | 0.806                  | 0.796                 | 0.793                | 0.796                   |
| 22 Nsun2       | 0.861                 | 0.862                  | 0.842                 | 0.834                | 0.828                   |
| 23 PUM2        | 0.946                 | 0.956                  | 0.5                   | 0.922                | 0.920                   |
| 24 QKI         | 0.962                 | 0.963                  | 0.5                   | 0.946                | 0.949                   |
| 25 SRSF1       | 0.872                 | 0.870                  | 0.5                   | 0.828                | 0.838                   |
| 26 TAF15       | 0.956                 | 0.959                  | 0.946                 | 0.931                | 0.937                   |
| 27 TDP-43      | 0.927                 | 0.927                  | 0.5                   | 0.917                | 0.919                   |
| 28 TIA1        | 0.926                 | 0.927                  | 0.916                 | 0.919                | 0.919                   |
| 29 TIAL1       | 0.884                 | 0.885                  | 0.5                   | 0.876                | 0.875                   |
| 30 U2AF2       | 0.941                 | 0.945                  | 0.5                   | 0.930                | 0.933                   |
| 31 U2AF2(KD)   | 0.923                 | 0.926                  | 0.5                   | 0.912                | 0.912                   |
